# Supplementary material for: In Vitro Antioxidant, Antiinflammation, and Anticancer Activities and Anthraquinone Content from Rumex crispus Root Extract and Fractions
Source: PubMed Central journal article supplement (PMC7464605; doi:10.3390/antiox9080726), 2020-08-10
Supplement: antioxidants-09-00726-s001.pdf [file antioxidants-09-00726-s001.pdf]

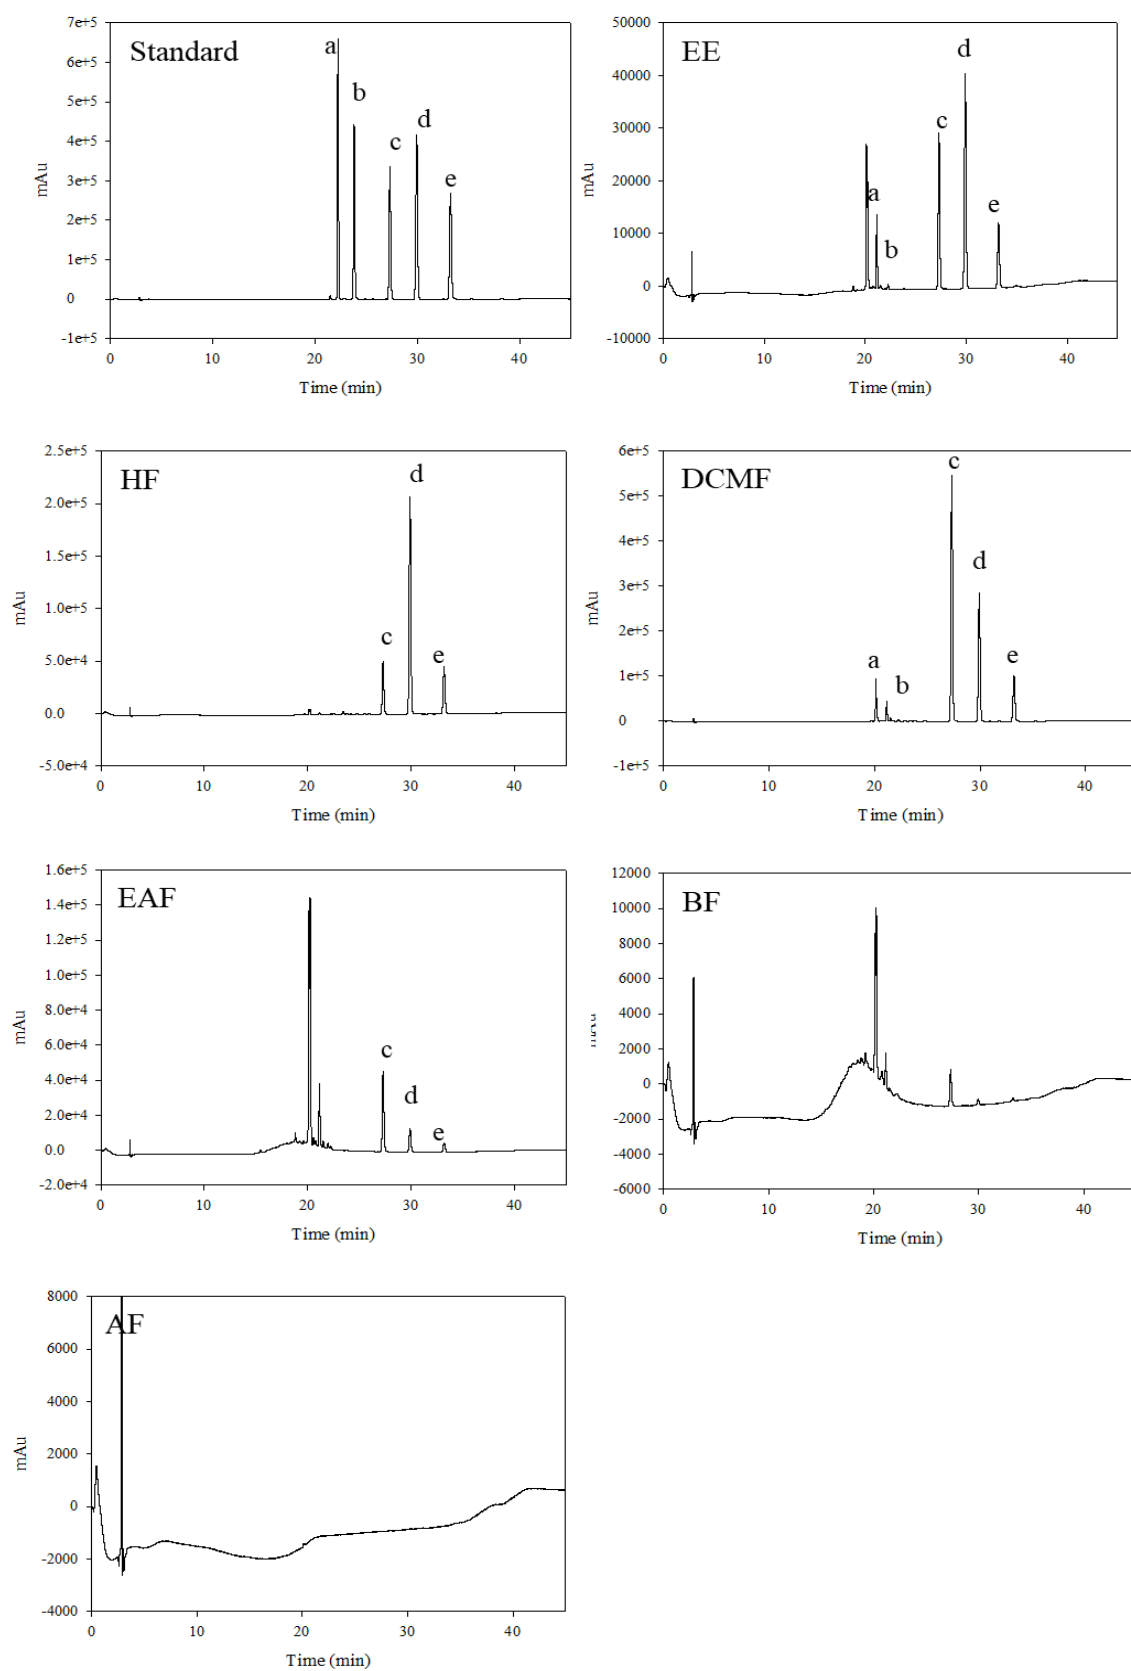

**Figure S1.** Chromatogram of *Rumex crispus* root extract and fractions at 420 nm. a: Aloe-emodin, b: Rhein, c: Emodin, d: Chrysophanol. e: Physcion (EE).
